# Supplementary material for: Mannose Attenuates Colitis-Associated Colorectal Tumorigenesis by Targeting Tumor-Associated Macrophages
Source: PubMed Central journal article supplement — J Cancer Prev. 2022 Mar 30;27(1):31–41. doi: 10.15430/JCP.2022.27.1.31 (PMC8984649; doi:10.15430/jcp.2022.27.1.31), 2022-03-30
Supplement: jcp-27-1-31-supple.pdf [file jcp-27-1-31-supple.pdf]

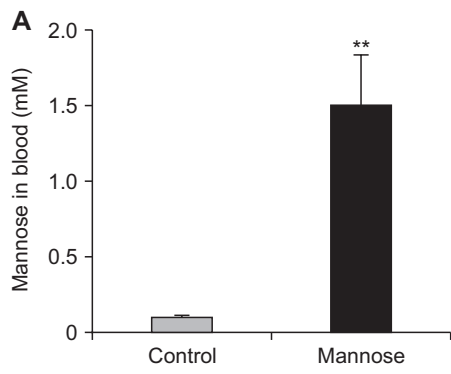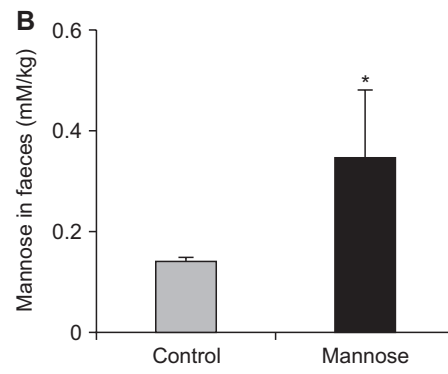

**Figure S1. Concentrations of mannose in plasma and faeces of mice.** (A) Mannose levels in the plasma after 60 min in mice treated with 2,000 mg/kg mannose. (B) Mannose levels of the faeces in mice treated with 2,000 mg/kg mannose. Data represent the mean  $\pm$  standard deviation. \* $P < 0.05$  and \*\* $P < 0.01$  compared with the Control group.

**Table S1.** Primer sequences used for real-time qPCR

| Gene             | Forward primer             | Reverse primer             |
|------------------|----------------------------|----------------------------|
| mOccludin        | TTGAAAGTCCACCTCCTTACAGA    | CCGGATAAAAAGAGTACGCTGG     |
| mClaudin1        | AGCTGCCTGTTCCATGTACT       | CTCCCATTTGTCTGCTGCTC       |
| mZO-1            | GCCGCTAAGAGCACAGCAA        | GCCCTCCTTTTAACACATCAGA     |
| mMUC2            | AGGGCTCGGAACTCCAGAAA       | CCAGGGAATCGGTAGACATCG      |
| mVEGF            | CCACGACAGAAGGAGAGCAGAAGTCC | CGTTACAGCAGCCTGCACAGCG     |
| mArg-1           | CCACAGTCTGGCAGTTGGAAG      | GGTTGTCAGGGGAGTGTGATG      |
| m $\beta$ -actin | GGCTGTATCCCCTCCATCG        | CCAGTTGGTAACAATGCCATGT     |
| hVEGF            | CACCATGCAGATTATGCGGA       | GAGGCTCCAGGGCATTAGAC       |
| hArg-1           | GTGGAACTTGCATGGACAAC       | AATCCTGGCACATCGGGAATC      |
| hHIF-1 $\alpha$  | ATCCATGTGACCATGAGGAAATG    | TCGGCTAGTTAGGGTACACTTC     |
| h $\beta$ -actin | GCCAGTAGAGGCAGGGATGATGTTC  | CCATGTTTCGTCATGGGTGTGAACCA |

m, mouse; h, human.
